# Supplementary material for: Taurine, glycine, tryptophan and kynurenine are key metabolic signatures for differentiation of extrapulmonary pleural tuberculosis
Source: Research Square preprint supplement (doi:10.21203/rs.3.rs-7093122/v1), 2025-07-28
Supplement: Supplementary file 2 [file 9d41079105f06c43290e66ea.xlsx]

## Sheet: Metabolite library
	Acylcarnitines
	C0	Carnitine		(C6-OH)	(Hydroxyhexanoylcarnitine)		C9	Nonaylcarnitine		C14:2-OH	Hydroxytetradecadienylcarnitine
	C2	Acetylcarnitine		C5-M-DC	Methylglutarylcarnitine		C10	Decanoylcarnitine		C16	Hexadecanoylcarnitine
	C3	Propionylcarnitine		C5-OH	Hydroxyvalerylcarnitine		C10:1	Decenoylcarnitine		C16-OH	Hydroxyhexadecanoylcarnitine
	C3-OH	Hydroxypropionylcarnitine		(C3-DC-M)	(Methylmalonylcarnitine)		C10:2	Decadienylcarnitine		C16:1	Hexadecenoylcarnitine
	C3:1	Propenoylcarnitine		C5:1	Tiglylcarnitine		C12	Dodecanoylcarnitine		C16:1-OH	Hydroxyhexadecenoylcarnitine
	C4	Butyrylcarnitine		C5:1-DC	Glutaconylcarnitine		C12-DC	Dodecanedioylcarnitine		C16:2	Hexadecadienylcarnitine
	C4-OH	Hydroxybutyrylcarnitine		C6	Hexanoylcarnitine		C12:1	Dodecenoylcarnitine		C16:2-OH	Hydroxyhexadecadienylcarnitine
	(C3-DC)	(Malonylcarnitine)		(C4:1-DC)	(Fumarylcarnitine)		C14	Tetradecanoylcarnitine		C18	Octadecanoylcarnitine
	C4:1	Butenylcarnitine		C6:1	Hexenoylcarnitine		C14:1	Tetradecenoylcarnitine		C18:1	Octadecenoylcarnitine
	C5	Valerylcarnitine		C7-DC	Pimeloylcarnitine		C14:1-OH	Hydroxytetradecenoylcarnitine		C18:1-OH	Hydroxyoctadecenoylcarnitine
	C5-DC	Glutarylcarnitine		C8	Octanoylcarnitine		C14:2	Tetradecadienylcarnitine		C18:2	Octadecadienylcarnitine
	Amino acids						Biogenic amines
	Ala	Alanine		Lys	Lysine		Ac-Orn	Acetylornithine		Met-SO	Methionine sulfoxide
	Arg	Arginine		Met	Methionine		alpha-AAA	alpha-Aminoadipic acid		Nitro-Tyr1	Nitrotyrosine
	Asn	Asparagine		Orn	Ornithine		ADMA	Asymmetric dimethylarginine		PEA	Phenylethylamine
	Asp	Aspartate		Phe	Phenylalanine		Carnosine	Carnosine		Putrescine	Putrescine
	Cit	Citrulline		Pro	Proline		Creatinine	Creatinine		Sarcosine	Sarcosine
	Glu	Glutamate		Ser	Serine		DOPA	Dihydroxyphenylalanine		Serotonin	Serotonin
	Gln	Glutamine		Thr	Threonine		Dopamine	Dopamine		Spermidine	Spermidine
	Gly	Glycine		Trp	Tryptophan		Histamine	Histamine		Spermine	Spermine
	His	Histidine		Tyr	Tyrosine		c4-OH-Pro	cis-4-Hydroxyproline		SDMA	Symmetric dimethylarginine
	Ile	Isoleucine		Val	Valine		t4-OH-Pro	trans-4-Hydroxyproline		Taurine	Taurine
	Leu	Leucine					Kynurenine	Kynurenine
	Glycerophospholipids
	lysoPC a C14:0	lysoPC a C28:0		PC aa C34:2	PC aa C38:3		PC aa C42:2	PC ae C34:3		PC ae C38:5	PC ae C42:4
	lysoPC a C16:0	lysoPC a C28:1		PC aa C34:3	PC aa C38:4		PC aa C42:4	PC ae C36:0		PC ae C38:6	PC ae C42:5
	lysoPC a C16:1	PC aa C24:0		PC aa C34:4	PC aa C38:5		PC aa C42:5	PC ae C36:1		PC ae C40:1	PC ae C44:3
	lysoPC a C17:0	PC aa C26:0		PC aa C36:0	PC aa C38:6		PC aa C42:6	PC ae C36:2		PC ae C40:2	PC ae C44:4
	lysoPC a C18:0	PC aa C28:1		PC aa C36:1	PC aa C40:1		PC ae C30:0	PC ae C36:3		PC ae C40:3	PC ae C44:5
	lysoPC a C18:1	PC aa C30:0		PC aa C36:2	PC aa C40:2		PC ae C30:1	PC ae C36:4		PC ae C40:4	PC ae C44:6
	lysoPC a C18:2	PC aa C30:22		PC aa C36:3	PC aa C40:3		PC ae C30:2	PC ae C36:5		PC ae C40:5
	lysoPC a C20:3	PC aa C32:0		PC aa C36:4	PC aa C40:4		PC ae C32:1	PC ae C38:0		PC ae C40:6
	lysoPC a C20:4	PC aa C32:1		PC aa C36:5	PC aa C40:5		PC ae C32:2	PC ae C38:1		PC ae C42:0
	lysoPC a C24:0	PC aa C32:2		PC aa C36:6	PC aa C40:6		PC ae C34:0	PC ae C38:2		PC ae C42:1
	lysoPC a C26:0	PC aa C32:3		PC aa C38:0	PC aa C42:0		PC ae C34:1	PC ae C38:3		PC ae C42:2
	lysoPC a C26:1	PC aa C34:1		PC aa C38:12	PC aa C42:1		PC ae C34:2	PC ae C38:4		PC ae C42:3
	Sphingomyelins						Monosaccharides
	SM (OH) C14:1	SM C18:0		SM (OH) C22:2	SM (OH) C24:1		H1	Hexoses (including glucose)
	SM C16:0	SM C18:1		SM C22:32	SM C26:0
	SM C16:1	SM C20:2		SM C24:0	SM C26:1
	SM (OH) C16:1	SM (OH) C22:1		SM C24:1

## Sheet: Normalised log counts
Sample Identification	Category	Sample Type	Acylcarnitines																																								Amino acids
			C0	C2	C3	C3-DC (C4-OH)	C3-OH	C3:1	C4	C4:1	C5	C5-DC (C6-OH)	C5-M-DC	C5-OH (C3-DC-M)	C5:1	C5:1-DC	C6 (C4:1-DC)	C6:1	C7-DC	C8	C9	C10	C10:1	C10:2	C12	C12-DC	C12:1	C14	C14:1	C14:1-OH	C14:2	C14:2-OH	C16	C16-OH	C16:1	C16:1-OH	C16:2	C16:2-OH	C18	C18:1	C18:1-OH	C18:2	Ala	Arg	Asn	Asp	Cit	Gln	Glu
HC1	Healthy	Serum	4.68	3.7	2.73	1.86	1.01	1.01	2.43	1.25	2.7	1.82	1.6	1.61	1.44	1.34	2.09	1.6	1.54	1.86	1.49	2.37	2.55	1.81	2.4	1.66	2.25	2.23	1.89	1.33	1.92	1.09	2.51	1.1	1.26	1.07	0.929	1.03	2.18	2.12	1.29	1.62	5.68	5.25	4.67	4.47	4.56	5.65	5.23
HC2	Healthy	Serum	4.59	3.49	2.31	2.15	1.46	1.41	1.92	1.51	2.05	2.02	1.98	1.87	1.74	1.64	1.63	1.92	1.55	1.91	1.5	1.85	2.38	2.05	1.67	1.66	2.17	1.67	1.8	1.26	2.48	1.24	2.07	1.18	1.34	1.4	1.02	1.3	1.92	2.25	1.93	1.74	5.47	4.89	4.61	4.25	4.22	5.66	4.78
HC3	Healthy	Serum	4.47	3.35	2.34	2.5	1.03	0.752	2.06	1	2.31	1.72	1.5	1.54	1.44	1.21	1.63	1.62	1.17	1.66	1.42	1.89	2.33	1.74	1.86	1.63	2.01	1.77	1.81	0.84	1.62	1.06	1.97	1.04	1.12	0.974	0.81	0.962	1.68	1.99	0.988	1.51	5.65	5	4.65	4.51	4.37	5.64	5.3
HC4	Healthy	Serum	4.57	3.52	2.47	2	1.16	1.06	2.35	1.21	2.5	1.82	1.72	1.6	1.54	1.37	1.78	1.63	1.6	1.68	1.38	2.06	2.33	1.77	1.85	1.57	2.1	1.77	1.84	1.04	1.83	1.08	2.06	1.09	1.23	1.01	1.07	0.874	1.78	2.11	1.3	1.53	5.45	5.08	4.66	4.45	4.43	5.54	5.12
HC5	Healthy	Serum	4.67	3.62	2.35	2.49	1.47	1.25	2.64	1.55	2.61	2.4	2.38	2.15	1.82	1.77	1.89	1.97	1.95	2	2.34	2.55	2.88	2.24	2.16	1.76	2.52	1.7	2.14	1.51	2.57	1.49	2.16	1.2	1.44	1.42	1.25	1.39	1.94	2.26	2.06	1.99	5.74	5.18	4.63	4.75	4.86	5.62	5.19
HC6	Healthy	Serum	4.68	3.76	2.21	2.35	1.25	1.24	1.97	1.48	2.01	1.91	-∞	-∞	1.85	1.62	1.97	1.85	1.53	1.86	1.32	2.3	2.55	1.88	2.03	1.62	2.24	1.83	1.96	1.21	2.42	1.26	2.14	1.02	1.54	1.29	1.38	1.35	1.81	2.24	1.74	1.96	5.61	5.27	4.6	4.82	4.55	5.53	5.58
HC7	Healthy	Serum	4.71	3.3	2.39	1.88	1.39	0.88	1.7	1.23	2.12	1.82	1.59	1.61	1.51	1.27	1.56	1.68	1.54	1.85	1.56	2.46	2.75	2.04	2.04	1.6	2.39	1.85	2.15	1.29	2.12	1.26	2.13	1.23	1.49	1.12	1.23	1.19	1.84	2.34	1.33	2.12	5.59	5.26	4.49	4.72	4.41	5.6	5.4
HC8	Healthy	Serum	4.54	3.23	2.39	1.4	0.856	0.695	1.91	1.01	2.08	1.7	1.51	1.46	1.3	1.16	1.52	1.49	1.25	1.69	1.86	2.2	2.49	1.89	1.74	1.54	2.18	1.78	2	1.22	1.64	1.06	2.01	1.15	1.27	1.07	0.856	0.956	1.67	2.25	1.02	1.73	5.55	5.33	4.61	4.55	4.32	5.61	5.26
HC9	Healthy	Serum	4.62	3.45	2.17	2.02	1.18	0.998	1.86	1.39	2.21	1.97	1.82	1.69	1.48	1.6	2.05	1.74	1.52	2.03	1.5	2.62	2.69	1.97	2.06	1.62	2.38	1.86	2.11	1.39	2.37	1.3	2.1	1.3	1.5	1.27	1.4	1.24	1.65	2.28	1.75	1.65	5.64	5.29	4.41	4.77	4.44	4.89	5.66
HC10	Healthy	Serum	4.62	3.28	2.53	2.5	0.927	-∞	2.12	1.06	2.22	1.82	1.43	1.51	1.32	1.06	1.43	1.54	1.11	1.53	1.57	1.75	2.39	2.03	1.59	1.55	2.13	1.63	1.75	1.22	1.48	0.953	1.88	1.2	0.914	0.963	0.766	1.02	1.61	2.04	0.903	1.57	5.74	5.29	4.79	4.67	4.42	5.63	5.3
PTB1	Pulmonary TB	Serum	4.53	3.56	2.3	1.74	1.36	1.04	2	1.3	2.07	1.85	1.69	1.66	-∞	1.4	1.7	1.67	1.57	1.91	1.61	2.55	2.66	1.91	2.17	1.62	2.39	1.93	2.09	1.43	2.24	1.13	1.99	1	1.62	1.35	1.17	1.21	1.72	2.14	1.54	1.7	5.45	5.01	4.45	4.34	4.22	5.64	4.64
PTB2	Pulmonary TB	Serum	4.44	3.43	2.5	2.25	1.06	1.31	1.86	1.45	2.11	1.81	1.74	1.85	1.54	1.49	1.67	1.82	1.49	1.86	1.47	2.3	2.6	1.95	1.94	1.55	2.38	1.78	2.03	1.17	2.45	1.18	2.05	1.15	1.4	1.4	1.17	1.1	1.86	2.27	1.78	1.88	5.59	5.06	4.65	4.55	4.53	5.78	5.19
PTB3	Pulmonary TB	Serum	4.42	3.38	1.9	2.03	1.07	1.12	1.88	1.11	1.66	1.88	1.59	1.58	1.42	1.23	1.57	1.62	1.36	1.6	1.26	1.93	2.44	1.88	1.77	1.52	2.17	1.76	1.74	1.2	1.85	0.9	1.93	0.953	1.34	1.08	1.1	0.966	1.66	2.15	1.02	1.74	5.31	4.97	4.43	4.4	4.19	5.57	4.67
PTB4	Pulmonary TB	Serum	4.08	3.45	1.99	1.62	1.61	1.08	2.22	1.2	2.52	1.84	1.66	1.68	1.54	1.4	1.5	1.65	1.42	1.64	1.35	2.05	2.36	1.78	1.82	1.49	2.11	1.72	1.71	1.18	1.8	0.969	2.01	0.739	1.38	1.09	1.08	1.07	1.67	2.15	1.05	1.56	5.27	5.06	4.46	4.55	3.86	5.48	4.89
PTB5	Pulmonary TB	Serum	4.59	3.7	2.36	1.74	-∞	0.83	2.16	1.05	2.24	1.76	1.58	1.41	1.4	1.31	2	1.62	1.24	2.04	1.36	2.54	2.54	1.84	2.03	1.61	2.17	1.89	1.79	1.14	1.94	1.01	2.17	1.14	1.49	1.15	1.13	1.14	1.77	2.18	1.1	1.81	5.6	5.06	4.62	4.21	4.38	5.88	4.72
PTB6	Pulmonary TB	Serum	4.65	3.7	2.55	1.63	1.01	0.937	2.12	1.16	2.27	1.79	1.58	1.65	1.54	1.28	1.89	1.6	1.33	1.74	1.36	2.34	2.23	1.8	1.86	1.56	2.03	1.93	1.68	1.18	1.53	0.976	2.19	1.2	1.41	1.2	1.04	1.07	1.91	2.21	1.1	1.47	5.71	5	4.51	4.57	4.13	5.72	5.19
PTB7	Pulmonary TB	Serum	4.76	3.89	2.66	1.64	1.18	1.71	2.2	1.32	2.45	1.87	1.58	1.79	1.42	1.31	1.9	2.15	1.57	1.74	1.68	2.24	2.57	1.98	1.9	1.68	2.32	1.85	1.84	1.3	1.98	1.12	2.11	0.984	1.58	1.21	1.25	1.26	1.65	2.3	1.27	1.95	5.47	4.92	4.55	4.36	4.3	5.58	5.21
PTB8	Pulmonary TB	Serum	4.81	3.84	2.77	2.32	1.05	1.02	2.78	1.09	2.93	1.87	1.71	2.24	1.39	1.21	2.09	1.52	1.58	2.03	1.64	2.56	2.61	2.02	2.17	1.57	2.3	1.86	1.97	1.37	2.03	1.13	2	1.07	1.36	0.971	1.08	1.09	1.62	2.11	0.933	1.51	5.65	5.18	4.63	4.34	4.65	5.68	5.23
PTB9	Pulmonary TB	Serum	4.84	3.81	2.84	1.75	1.05	1.22	2.7	0.989	3	1.89	1.63	2	1.24	1.19	1.71	1.57	1.34	1.55	1.36	1.94	2.37	1.7	1.53	1.55	2.03	1.67	1.55	1.13	1.5	0.918	1.78	1.15	1.25	0.951	0.825	1.11	1.51	2.1	1.07	1.66	5.5	5.25	4.59	4.51	4.5	5.57	4.95
PTB10	Pulmonary TB	Serum	4.55	3.52	2.22	1.89	0.923	0.768	2.31	0.91	2.11	1.72	1.58	1.43	1.14	1.07	1.6	1.5	1.31	1.65	1.41	2.27	2.48	1.84	1.92	1.52	2.25	1.81	1.75	1.11	1.73	1.04	1.92	1	1.27	1.04	1.09	0.935	1.58	2.09	0.92	1.53	5.48	4.94	4.56	4.54	4.26	5.74	4.96
PlTB1	Pleural TB	Serum	4.68	3.59	2.4	2.47	1.45	1.34	2.24	1.56	2.44	1.98	1.96	1.81	1.72	1.76	1.79	1.87	1.53	1.97	1.6	2.22	2.58	2.1	1.91	1.7	2.28	1.76	1.93	1.36	2.43	1.18	2.06	1.1	1.38	1.1	1.24	1.03	1.93	2.21	1.83	1.78	5.5	5.18	4.57	4.32	4.37	5.81	4.75
PlTB2	Pleural TB	Serum	4.66	3.83	2.59	1.9	0.949	0.907	1.96	1.21	1.78	1.89	1.55	1.59	1.2	1.18	1.61	1.6	1.44	1.56	1.31	2.02	2.37	1.84	1.84	1.56	2.21	1.81	1.83	1.33	1.93	1.27	2.12	1.07	1.67	1.19	1.15	1.25	1.66	2.39	1.02	1.97	5.48	5.12	4.63	4.78	4.1	5.59	5.16
PlTB3	Pleural TB	Serum	4.7	3.61	2.67	1.89	1.06	1.02	2.32	1.2	1.96	1.74	1.58	1.7	1.44	1.38	1.56	1.65	1.75	1.66	1.31	1.87	2.48	1.98	1.6	1.58	2.23	1.7	1.91	1.18	1.96	0.907	2.03	0.905	1.23	1.06	0.966	1.15	1.62	2.24	1.39	1.71	5.51	5.06	4.6	4.35	4.23	5.76	4.8
PlTB4	Pleural TB	Serum	4.6	3.8	2.55	1.83	0.808	0.786	2.23	1.11	2.31	1.94	1.71	1.71	1.26	1.36	1.79	1.54	1.54	1.76	1.76	2.39	2.59	2.05	1.97	1.53	2.27	1.91	1.75	1.4	1.72	1.16	2.07	1.12	1.4	1.18	1.05	1.17	1.73	2.19	0.791	1.73	5.5	5.1	4.46	4.19	4.61	5.67	4.82
PlTB5	Pleural TB	Serum	4.37	3.45	2.15	2.39	1.41	1.15	1.92	1.47	1.8	2.01	1.92	1.77	1.77	1.63	1.76	1.88	-∞	1.95	1.48	2.29	2.54	2.02	1.79	1.59	2.17	1.73	1.7	1.11	2.34	1.16	1.65	1.12	0.978	1.08	1.14	1.09	1.75	2.02	1.61	1.47	5.4	4.94	4.39	4.31	4.13	5.56	4.57
PlTB6	Pleural TB	Serum	4.76	3.98	2.36	2.22	0.959	0.966	2.18	1.04	2.15	1.93	1.57	1.48	1.38	1.22	1.88	1.58	1.5	2.07	1.49	2.58	2.61	2.02	2.08	1.65	2.28	1.88	1.93	1.34	2.03	1.29	2.16	1.13	1.72	1.3	1.41	1.2	1.81	2.34	1.17	2.07	5.53	5.09	4.71	4.12	4.65	5.93	4.79
PlTB7	Pleural TB	Serum	4.53	3.6	2.32	1.69	1.11	0.928	2.18	1.16	2.18	1.84	1.63	1.72	1.75	1.23	1.73	1.58	1.33	1.77	1.26	2.29	2.42	1.97	1.85	1.32	2.05	1.79	1.69	1.09	1.83	1.03	2.09	1.15	1.38	1.08	1.09	1.01	1.74	2.15	1.05	1.82	5.58	5.14	4.64	4.51	4.36	5.81	4.79
PlTB8	Pleural TB	Serum	4.5	3.78	2.32	2.5	1.48	1.31	2.29	1.52	2.2	2.03	1.97	1.87	1.89	1.73	1.84	1.87	1.45	1.94	1.47	2.08	2.56	2.01	1.85	1.67	2.23	1.84	1.91	1.25	2.46	1.34	2.04	1.02	1.52	1.26	1.18	1.21	1.83	2.25	1.79	1.92	5.51	5.15	4.54	4.01	4.47	5.82	5.06
PlTB9	Pleural TB	Serum	4.67	3.92	2.53	1.74	0.917	1.12	1.95	1.16	2.04	1.84	1.58	1.59	1.24	1.27	1.78	1.61	1.5	1.69	1.33	2.25	2.35	1.77	1.86	1.68	2.15	1.83	1.9	1.33	1.81	1.06	2.28	1.16	1.56	1.21	1.16	1.27	1.66	2.31	1.16	1.84	5.53	5.22	4.59	4.71	4.29	5.57	5.35
PlTB10	Pleural TB	Serum	4.41	3.66	2.05	1.99	1.22	1.1	2.07	1.35	2.05	1.89	1.69	1.61	1.47	1.48	1.76	1.73	1.43	1.78	1.28	2.39	2.63	1.9	1.93	1.58	2.42	1.73	2.05	1.24	2.33	1.3	1.87	1.13	1.4	1.18	1.2	1.18	1.55	2.15	1.69	1.75	5.37	5.12	4.46	4.55	4.25	5.55	5.02
PlTB11	Pleural TB	Pleural fluid	4.51	3.46	2.56	1.76	0.958	1.02	2.21	1.28	2.16	1.89	1.89	1.63	1.51	1.42	1.68	1.61	1.52	1.68	1.24	1.97	2.42	1.86	1.73	1.58	2.15	1.79	1.54	1.26	1.94	1.13	1.95	0.977	1.4	1.11	1.27	1.09	1.72	2.02	1.35	1.46	5.13	4.7	4.29	3.41	4.03	5.51	4.26
PlTB12	Pleural TB	Pleural fluid	4.66	3.57	2.53	2.02	0.74	1.03	2.24	1.01	2.22	1.76	1.59	1.57	1.19	1.13	1.83	1.55	1.25	1.68	1.42	2.42	2.38	1.86	2.25	1.55	2.26	2.38	1.97	1.5	1.79	1.08	2.79	1.36	2.05	1.52	1.61	1.38	2.54	2.54	1.26	2.02	5.36	4.85	4.35	3.67	4.18	5.56	4.59
PlTB13	Pleural TB	Pleural fluid	4.64	3.51	2.49	1.94	1.1	0.842	2.08	1.13	2.13	1.88	1.7	1.68	1.42	1.21	1.65	1.6	1.21	1.54	1.26	1.88	2.37	1.85	1.76	1.56	2.11	1.74	1.58	1.09	1.62	0.921	1.94	1.05	1.29	1.08	1.17	1.05	1.68	1.97	0.997	1.46	5.54	5.06	4.74	3.41	4.48	5.81	4.51
PlTB14	Pleural TB	Pleural fluid	4.56	3.64	2.29	1.56	1.18	0.841	2.07	1.01	2.16	1.77	1.54	1.51	1.26	1.3	1.68	1.56	1.26	1.52	1.31	2.05	2.27	1.72	1.99	1.6	2.11	2.17	1.76	1.34	1.87	1.1	2.62	1.16	1.84	1.5	1.42	1.26	2.27	2.35	1.26	1.94	5.51	4.93	4.55	3.72	4.34	5.63	4.96
PlTB15	Pleural TB	Pleural fluid	4.65	3.37	2.39	2.19	1.02	1.06	2.03	0.908	2.08	1.87	1.54	1.64	1.16	1.11	1.46	1.54	1.11	1.55	1.27	1.96	2.47	1.87	1.76	1.49	2.15	1.89	1.58	1.3	1.73	1.15	2.23	1.11	1.59	1.09	1.4	1.03	1.77	2.16	0.96	1.81	5.45	5.14	4.84	3.71	4.38	5.84	4.61
PlTB16	Pleural TB	Pleural fluid	4.55	3.88	2.44	1.83	1.45	1.01	2.38	1.08	2.69	1.83	1.57	1.56	1.23	1.17	1.95	1.58	1.48	1.75	1.32	2.32	2.62	1.92	2.14	1.63	2.34	2.27	2.04	1.58	2.08	1.13	2.7	1.23	1.94	1.44	1.75	1.34	2.23	2.4	1.26	2.21	5.2	4.84	4.47	3.32	4.06	5.63	4.31
PlTB17	Pleural TB	Pleural fluid	4.4	3.53	2.18	2.32	0.826	0.947	2.03	1.13	1.95	1.88	1.81	1.54	1.44	1.35	1.7	1.72	1.45	1.74	1.26	2.05	2.48	1.83	1.77	1.62	2.12	1.81	1.6	1.1	1.93	0.944	1.88	1.06	1.28	1.09	0.984	1.14	1.72	2.03	1.3	1.39	5.27	4.77	4.56	3.26	4.27	5.66	4.12
PlTB18	Pleural TB	Pleural fluid	4.77	3.77	2.6	2.02	1.09	1.19	2.22	1.2	2.26	1.9	1.72	1.97	1.71	1.46	1.85	1.67	1.47	1.78	1.36	2.21	2.44	1.84	1.66	1.55	2.13	1.89	1.66	1.29	2.02	1.11	2.03	1.15	1.4	1.27	1.32	1.32	1.78	2.08	1.32	1.58	5.35	5.01	4.64	3.54	4.04	5.71	4.5
PlTB19	Pleural TB	Pleural fluid	4.64	3.6	2.34	1.84	1.07	0.934	2.24	1.03	2.04	1.87	1.61	1.7	1.15	1.09	1.73	1.51	1.13	1.56	1.14	1.98	2.44	1.79	1.77	1.57	2.15	1.75	1.66	1.13	1.57	0.846	2.09	0.916	1.44	1.05	1.37	1.15	1.81	2.16	1	1.84	5.43	5.13	4.75	3.48	4.49	5.73	4.46
PlTB20	Pleural TB	Pleural fluid	4.71	3.91	2.54	2.21	1.23	1.15	2.97	1.49	2.35	1.96	1.87	1.75	1.71	1.62	2	1.87	1.46	1.86	1.48	2.31	2.5	1.86	1.86	1.58	2.27	1.9	1.78	1.13	2.39	1.16	2.25	1.04	1.71	1.2	1.19	1.29	1.88	2.21	1.8	1.79	5.44	4.99	4.61	3.78	4.38	5.69	5.01
OD1	Other Diseases	Serum	4.64	4.02	2.34	1.78	1.05	0.84	2.08	1.18	2.06	1.81	1.57	1.8	1.18	1.17	1.98	1.6	1.33	2.06	1.38	2.49	2.43	1.93	2.13	1.6	2.33	1.97	2.21	1.46	2.25	1.09	2.19	1.14	1.9	1.25	1.54	1.23	1.64	2.36	1.27	1.96	5.49	4.93	4.55	4.21	4.06	5.71	4.91
OD2	Other Diseases	Serum	4.61	3.7	2.48	1.39	0.773	0.855	2.14	1.08	1.91	1.69	1.6	1.35	1.26	1.21	1.82	1.47	1.26	1.67	1.55	2.31	2.46	1.95	1.98	1.55	2.12	1.97	1.9	1.26	1.72	1.12	2.37	1.17	1.72	1.25	1.19	1.21	1.86	2.44	1.1	2.06	5.63	5.05	4.63	4.41	4.65	5.87	4.87
OD3	Other Diseases	Serum	4.76	3.91	2.63	2.01	1.4	1.05	2.46	1.15	2.86	1.82	1.8	1.52	1.15	1.14	2.04	1.53	1.23	2.06	1.39	2.54	2.58	1.95	1.89	1.54	2.23	1.71	1.76	1.27	1.78	0.941	1.78	0.989	1.39	1.06	0.994	0.881	1.44	2.13	0.819	1.43	5.29	4.63	4.34	3.72	3.79	5.58	4.58
OD4	Other Diseases	Serum	4.66	3.71	2.52	2.19	1.01	0.925	2.4	1.16	2.43	1.82	1.65	1.7	1.57	1.38	1.75	1.65	1.49	1.69	1.42	2.15	2.39	1.87	1.77	1.6	2.16	1.68	1.74	1.13	1.83	1.22	1.85	1.07	1.12	0.955	1.1	1.15	1.57	2.11	1.31	1.6	5.52	5.13	4.66	4	4.27	5.71	4.73
OD5	Other Diseases	Serum	4.49	3.45	2.5	1.7	1.61	1.05	2.44	1.07	2.8	1.81	1.69	1.61	1.24	1.21	1.45	1.54	1.39	1.59	1.75	2.22	2.26	1.95	1.85	1.57	2.12	1.83	1.82	1.3	1.39	1	1.92	1.03	1.37	1.07	0.909	1	1.51	2.11	0.794	1.33	5.36	4.93	4.34	4.36	4.09	5.62	4.91
OD6	Other Diseases	Serum	4.6	3.93	2.25	2.38	1.09	0.848	2.1	1.08	1.93	1.83	1.58	1.63	1.53	1.34	1.88	1.58	1.47	1.8	1.27	2.45	2.43	1.71	2.05	1.52	2.37	1.94	2.05	1.36	1.99	1.19	2.19	1.2	1.74	1.28	1.35	1.26	1.73	2.35	1.28	1.63	5.53	5.05	4.58	4.32	4.34	5.54	5.36
OD7	Other Diseases	Serum	4.75	3.15	2.11	1.99	1.08	0.793	1.81	0.949	2.05	1.81	1.57	1.61	1.6	1.18	1.63	1.6	1.25	1.73	1.42	2.37	2.47	1.73	2.02	1.54	2.27	1.87	1.93	1.37	1.9	1.19	2.2	1.04	1.7	1.12	1.17	1.11	1.8	2.33	1.25	1.83	5.68	5.44	4.51	4.89	4.38	5.2	5.54
OD8	Other Diseases	Serum	4.63	3.89	2.52	2.43	1.61	1.41	2.63	1.59	3.47	2.04	1.93	2.1	1.84	1.72	2.08	1.93	1.65	2.1	1.82	2.75	2.75	2.04	2.21	1.7	2.48	2	2.13	1.36	2.52	1.44	2.1	1.26	1.77	1.29	1.43	1.3	1.82	2.15	1.81	1.74	5.43	5.07	4.36	4.06	4.44	5.35	5.51
OD9	Other Diseases	Serum	4.75	3.47	2.45	2.36	1.37	-∞	2.3	1.35	2.28	1.96	1.93	1.84	1.69	1.63	1.56	1.81	1.42	1.83	1.34	2.04	2.49	1.87	1.73	1.67	2.22	1.74	1.75	1.34	2.16	1.16	2.2	1.18	1.33	1.07	1.06	1.14	1.89	2.11	1.66	1.6	5.66	5.15	4.7	4.15	4.22	5.79	4.79
OD10	Other Diseases	Serum	4.55	3.44	2.27	2.17	1.09	0.995	2.56	1.26	2.24	1.75	1.62	1.46	1.42	1.31	1.74	1.73	1.3	1.75	1.5	2.31	2.54	1.87	1.8	1.45	2.17	1.72	1.89	1.2	1.8	1.14	1.87	1.07	1.32	0.908	1.16	1	1.58	2.16	0.987	1.77	5.47	4.99	4.34	4.04	4.56	5.6	5.14
OD11	Other Diseases	Pleural fluid	4.9	4.13	2.8	2.04	1.38	-∞	2.58	1.45	2.31	1.99	1.95	1.88	1.89	1.53	1.95	1.82	1.68	1.93	1.45	2.29	2.56	1.92	1.87	1.52	2.3	1.87	1.77	1.43	2.41	1.36	2.67	1.49	1.78	1.47	1.3	1.32	2.37	2.47	1.94	2.37	5.69	5.13	5	4.32	4.48	5.8	4.78
OD12	Other Diseases	Pleural fluid	4.6	3.77	2.41	1.91	1.24	0.928	2.1	1.25	2.2	1.76	1.64	1.52	1.28	1.21	1.73	1.59	1.21	1.6	1.3	2.02	2.42	1.9	1.74	1.53	2.04	1.62	1.56	1.25	1.57	1.16	1.82	0.991	1.36	1.15	0.993	1.11	1.57	2.08	0.926	1.51	5.49	5.04	4.69	3	4.56	5.89	4.52
OD13	Other Diseases	Pleural fluid	4.71	3.57	2.47	1.57	0.909	0.896	2.31	0.938	2.15	1.69	1.55	1.47	1.19	1.11	1.54	1.52	1.24	1.64	1.37	1.91	2.37	1.95	1.62	1.56	2.1	1.77	1.71	1.27	1.6	1.26	1.94	1.35	1.37	1.19	1.14	1.01	1.51	2.15	0.958	1.43	5.61	5.08	4.75	3.61	4.53	5.83	5.11
OD14	Other Diseases	Pleural fluid	4.62	3.93	2.49	2.03	0.876	0.936	2.22	1.14	2.71	1.76	1.73	1.66	1.61	1.23	1.93	1.66	1.31	1.85	1.36	2.33	2.4	1.88	1.96	1.53	2.15	2.02	1.72	1.4	1.8	1.1	2.41	1.25	1.71	1.2	1.28	1.27	2.11	2.51	1.15	1.95	5.47	4.79	4.56	3.82	4.17	5.68	4.87
OD15	Other Diseases	Pleural fluid	4.66	3.59	2.33	1.95	1.1	0.885	2.13	1.11	1.83	1.72	1.62	1.53	1.59	1.23	1.6	1.59	1.2	1.62	1.32	1.8	2.25	1.82	1.55	1.41	1.91	1.67	1.55	1.19	1.67	1.14	1.88	1.27	1.37	0.912	0.965	1.19	1.68	1.99	1.04	1.49	5.62	5.1	4.85	3.72	4.49	5.87	4.58
OD16	Other Diseases	Pleural fluid	5.07	4.21	3	2.47	1.54	1.18	2.74	1.42	3.03	2.07	1.91	1.78	1.76	1.59	2.33	1.86	1.54	2.01	1.48	2.48	2.69	1.93	2.03	1.64	2.36	1.76	1.78	1.26	2.33	1.04	2.18	1.29	1.51	1.16	1.35	1.16	1.93	2.15	1.63	1.7	5.53	5.07	4.85	3.91	4.1	5.98	4.75
OD17	Other Diseases	Pleural fluid	4.7	3.74	2.6	2	0.843	0.975	2.85	1.02	2.42	1.74	1.5	1.71	1.22	1.16	2.12	1.52	1.28	1.88	1.39	2.45	2.42	1.92	2.18	1.57	2.11	2.27	1.76	1.37	1.79	1.21	2.36	1.31	1.57	1.14	1.44	1.26	1.82	2.06	0.962	1.63	5.66	5.22	4.97	4.12	4.22	5.89	4.86
OD18	Other Diseases	Pleural fluid	4.48	3.48	2.5	1.81	1.61	0.956	2.4	1.2	2.74	1.85	1.81	1.64	1.19	1.23	1.56	1.55	1.28	1.54	1.52	2.08	2.3	1.83	1.66	1.52	2.16	1.76	1.53	1.12	1.33	0.948	1.81	0.98	1.25	1.16	0.974	1.02	1.45	2.06	0.972	1.16	5.23	4.69	4.58	3.28	4.07	5.64	4.66
OD19	Other Diseases	Pleural fluid	4.65	3.78	2.47	2.13	1.29	0.853	2.33	1.08	2.26	1.78	1.58	1.51	1.1	1.09	1.9	1.43	1.22	1.57	1.24	2.09	2.41	1.78	1.7	1.52	2.16	1.75	1.64	1.28	1.53	0.994	1.84	1.21	1.44	1.04	1.09	1.08	1.51	2.08	1.05	1.37	5.65	4.97	4.71	3.59	4	5.9	4.36
OD20	Other Diseases	Pleural fluid	4.73	3.77	2.6	2.22	1.47	1.13	2.46	1.12	2.78	1.82	1.66	1.86	1.61	1.24	1.86	1.67	1.44	1.81	1.51	2.32	2.5	1.8	1.91	1.53	2.2	1.84	1.73	1.27	2.02	1.25	2.06	1.27	1.37	1.22	1.29	1.33	1.79	2.15	1.27	1.68	5.5	5.16	4.84	3.86	4.39	5.78	5.01
[truncated: 138 more columns]
